# Supplementary material
Source: Springer Nature journal article supplement (https://www.springermedizin.de/resource/supplementary/12903_2014_392_MOESM6_ESM.pdf/9516936)
Supplement: MOESM6 [file 9516936]

**Figure 4 – Quality appraisal of eligible papers identified by literature review**

|                                                                                      | <u>Kulich 2003</u>                                                                                                                                                                                                                                                                                                                                                                                                          | <u>Loignon 2010</u>                                                                                                                                                                                                                                                                                                          | <u>Scambler 2011</u>                                                                                                                                                                                                                                                                                                                                                                                                               |
|--------------------------------------------------------------------------------------|-----------------------------------------------------------------------------------------------------------------------------------------------------------------------------------------------------------------------------------------------------------------------------------------------------------------------------------------------------------------------------------------------------------------------------|------------------------------------------------------------------------------------------------------------------------------------------------------------------------------------------------------------------------------------------------------------------------------------------------------------------------------|------------------------------------------------------------------------------------------------------------------------------------------------------------------------------------------------------------------------------------------------------------------------------------------------------------------------------------------------------------------------------------------------------------------------------------|
| Was there a clear statement of the aims of the research?                             | Y                                                                                                                                                                                                                                                                                                                                                                                                                           | Y                                                                                                                                                                                                                                                                                                                            | Y                                                                                                                                                                                                                                                                                                                                                                                                                                  |
| Is a qualitative methodology appropriate?                                            | Y                                                                                                                                                                                                                                                                                                                                                                                                                           | Y                                                                                                                                                                                                                                                                                                                            | Y                                                                                                                                                                                                                                                                                                                                                                                                                                  |
| Was the research design appropriate to address the aims of the research?             | Y                                                                                                                                                                                                                                                                                                                                                                                                                           | Y                                                                                                                                                                                                                                                                                                                            | Y                                                                                                                                                                                                                                                                                                                                                                                                                                  |
| Was the recruitment strategy appropriate to the aims of the research?                | Y                                                                                                                                                                                                                                                                                                                                                                                                                           | Y                                                                                                                                                                                                                                                                                                                            | Limited detail on recruitment / sampling                                                                                                                                                                                                                                                                                                                                                                                           |
| Were the data collected in a way that addressed the research issue?                  | Y                                                                                                                                                                                                                                                                                                                                                                                                                           | Y                                                                                                                                                                                                                                                                                                                            | Y                                                                                                                                                                                                                                                                                                                                                                                                                                  |
| Has the relationship between researcher and participants been adequately considered? | Not disclosed                                                                                                                                                                                                                                                                                                                                                                                                               | Not disclosed                                                                                                                                                                                                                                                                                                                | Not disclosed                                                                                                                                                                                                                                                                                                                                                                                                                      |
| Have ethical issues been taken into consideration?                                   | Y                                                                                                                                                                                                                                                                                                                                                                                                                           | Y                                                                                                                                                                                                                                                                                                                            | Y                                                                                                                                                                                                                                                                                                                                                                                                                                  |
| Was the data analysis sufficiently rigorous?                                         | Detail provided on analysis but would appear to have been conducted independently                                                                                                                                                                                                                                                                                                                                           | Y                                                                                                                                                                                                                                                                                                                            | Lack of detail about who conducted analysis                                                                                                                                                                                                                                                                                                                                                                                        |
| Is there a clear statement of findings?                                              | Y                                                                                                                                                                                                                                                                                                                                                                                                                           | Y                                                                                                                                                                                                                                                                                                                            | Y                                                                                                                                                                                                                                                                                                                                                                                                                                  |
| How valuable is the research?                                                        | Y                                                                                                                                                                                                                                                                                                                                                                                                                           | Y                                                                                                                                                                                                                                                                                                                            | Research subject not directly related to literature review but does provide some information on PCC                                                                                                                                                                                                                                                                                                                                |
| Reviewers comments                                                                   | Research highlights 5 facets of delivering a socio-humanistic approach which is consistent with patient-centred care. Recognition that this patient-centred approach had been developed as a consequence of personal experiences and reflection rather than specific training. Study specifically concerned with patients living in poverty, but findings likely to be relevant to delivery of PCC in dentistry in general. | Very interesting paper in terms of research question, methodology and findings. The use of video recording the consultation and then using this as part of the interview process would appear to have enriched the data considerably. Clear theoretical framework described with strong similarities to pre-existing models. | Research focuses on staff attitudes towards delivery of dental care to disabled adults and compares the results against a theoretical framework based on the social model of disability. Key theme to emerge from the interviews is PCC which is described as being “at the heart of the model”. Features of PCC described which focus on a holistic approach, individualised care, communication, trust, information and support. |
